# Supplementary material
Source: PubMed Central journal article supplement (PMC3859163)
Supplement: 10-1055-s-0033-1350824-sup_gf669.pdf [file 10-1055-s-0033-1350824-sup_gf669.pdf]

# Erläuterung und Anwendung der kolposkopischen Nomenklatur der IFCPC (International Federation for Cervical Pathology and Colposcopy) Rio 2011

## Explanation and Use of the Colposcopy Terminology of the IFCPC (International Federation for Cervical Pathology and Colposcopy) Rio 2011

### Autoren

J. Quaas<sup>3</sup>, O. Reich<sup>1</sup>, B. Frey Tirri<sup>2</sup>, V. Küppers<sup>3</sup>

### Institute

<sup>1</sup> für den Vorstand der Arbeitsgemeinschaft Kolposkopie (AGK, Österreich)

<sup>2</sup> für den Vorstand der Arbeitsgemeinschaft für Kolposkopie und Zervixpathologie (AGKOL, Schweiz)

<sup>3</sup> für den Vorstand der Arbeitsgemeinschaft für Kolposkopie und Zervixpathologie (AGCPC, Deutschland)

### Schlüsselwörter

- Kolposkopie
- Cervix uteri
- Nomenklatur
- IFCPC Rio de Janeiro 2011

### Key words

- colposcopy
- cervix uteri
- nomenclature
- IFCPC Rio de Janeiro 2011

### Bibliografie

**DOI** <http://dx.doi.org/10.1055/s-0033-1350824>  
 Geburtsh Frauenheilk 2013; 73:  
 1–4 © Georg Thieme Verlag KG  
 Stuttgart · New York ·  
 ISSN 0016-5751

### Korrespondenzadresse

**Dr. Jens Quaas**  
 Sekretär der Arbeitsgemein-  
 schaft Zervixpathologie  
 & Kolposkopie  
 Grünthal 22  
 18437 Hanssestadt Stralsund  
 dr@jquaas.de  
 www.ag-cpc.de

**Priv.-Doz. Dr. med. Volkmar  
 Küppers, Facharzt für Frauen-  
 heilkunde und Geburtshilfe**  
 Zytologisches Labor –  
 Dysplasie-Sprechstunde  
 Königsallee 64  
 40212 Düsseldorf  
 info@dysplasie-praxis.de

### Zusammenfassung

▼  
 Im Juli 2012 wurde eine überarbeitete Nomenklatur zur kolposkopischen Untersuchung der Cervix uteri durch die IFCPC verabschiedet. Im Mittelpunkt steht die Beschreibung von Merkmalen, die helfen sollen, Krankheitsbilder an der Cervix uteri zu definieren. Die Nomenklatur ist so aufgebaut, dass der Untersucher nach einem bestimmten Schema kolposkopische Kriterien beurteilt. Zunächst wird geprüft, ob die Kolposkopie repräsentativ ist. Dann soll geklärt werden, ob ein Normalbefund vorliegt. Liegen keine Normalbefunde, sondern abnorme Befunde vor, wird die Schwere der Läsion in sog. Grad-1- (minor change) und Grad-2-Befunde (major change) festgelegt. Es werden auch nicht spezifische abnorme Befunde – die Leukoplakie, die Erosion und die Lugol-Probe – definiert. Gesondert werden Merkmale beschrieben, die verdächtig auf eine Invasion sind, insbesondere wird hier auf die atypischen Gefäßmuster hingewiesen. Wie schon in der letzten überarbeiteten Nomenklatur (Barcelona) werden in einer letzten Gruppe verschiedene Befunde beschrieben: kongenitale Transformationszone (KTZ), kongenitale Anomalie, Kondylome (Papillome), Endometriose, Polypen (ektozervikal, endozervikal) Entzündung, Stenose, postoperative Veränderung (vernarbte Portio, Scheidenblindsack).

### Einleitung

▼  
 Die neue und damit aktuelle koloskopische Nomenklatur wurde am 1.7.2012 in der Zeitschrift „Obstetrics & Gynecology“ publiziert [1]. Vorangegangen war die Bestellung eines Nomenklatur-Komitees im Jahr 2008 anlässlich des Weltkongresses in Oakland, Neuseeland. Nach ausgiebiger Literatursuche, mehreren Meetings und ausführlicher Diskussion in der Website

### Abstract

▼  
 In July 2012 a revised terminology on colposcopic examinations of the cervix uteri was adopted by IFCPC. Central aspect is a description of characteristics that should aid in the definition of the disease entity cervix uteri. The nomenclature is built up in such a way that the examiner can evaluate colposcopic criteria according to a specific scheme. Firstly it is assessed whether the colposcopy is representative. Then it should be clarified whether or not the findings are normal. If the findings are not normal but rather abnormal the severity of the lesion is classified according to the so-called grade 1 (minor change) and grade 2 findings (major change). Specific abnormal findings such as leukoplakia, erosion and Lugol's finding are also not defined at this point. Characteristics suspicious for an invasion are described separately, in particular, atypical vessel patterns are mentioned here. As already held in the previous revised nomenclature (Barcelona), various findings are described in a last group: congenital transformation zones (CTZ), congenital anomalies, condylomas (papillomas), endometriosis, polyps (ectocervical, endocervical), inflammation, stenosis, postoperative changes (scarred portio, vaginal stump).

der IFCPC wurde schließlich anlässlich des Weltkongresses in Rio de Janeiro im Juli 2011 die nunmehr neue Nomenklatur von der IFCPC beschlossen.

Die neue Nomenklatur 2011 besteht aus 3 Teilen: 1. Nomenklatur betreffend die Cervix uteri (● Tab. 1) inkl. einem Addendum zur Definition von Exzisionstypen (● Tab. 2). 2. Nomenklatur der Vagina.

**Tab. 1** Kolposkopische Nomenklatur der Cervix uteri (IFCPC 2011), nach [9].

| IFCPC 2011            | Rio de Janeiro        | kolposkopische Nomenklatur Cervix uteri                                                                                                                                                                                               |
|-----------------------|-----------------------|---------------------------------------------------------------------------------------------------------------------------------------------------------------------------------------------------------------------------------------|
| Grund-sätzliches:     |                       | adäquat/inadäquat: <i>Begründung:</i> (z. B.: Entzündung, Blutung, Narben) Zylinder – Plattenepithel – Grenze (ZPG): vollständig/teilweise/nicht einsehbar Transformationszone (Typ 1, 2, 3)                                          |
| normale Befunde       |                       | originäres Plattenepithel:<br>▶ reif<br>▶ atroph<br>Zylinderepithel<br>▶ Ektopie<br>metaplastisches Plattenepithel<br>▶ Ovula Nabothii<br>▶ Drüsenausführungsgänge<br>Deziduose in der Schwangerschaft                                |
| abnorme Befunde       | Grund-sätzliches:     | <b>Lokalisation der Läsion:</b> innerhalb oder außerhalb der TZ, <i>Angabe entsprechend Uhrzeiger</i><br><b>Größe der Läsion:</b> Anzahl der betroffenen Quadranten<br>Prozent der Zervix                                             |
|                       | Grad 1 (minor change) | zart essigweißes Epithel, zartes Mosaik, zarte Punktierung                                                                                                                                                                            |
|                       | Grad 2 (major change) | intensiv essigweißes Epithel<br>grobes Mosaik, grobe Punktierung<br>prominente Drüsenausführungsgänge<br>scharfe Grenzen<br>„inner border sign“, „ridge sign“<br>rasche Essigsäurewirkung                                             |
|                       | nicht spezifisch      | Leukoplakie (Keratose, Hyperkeratose),<br>Erosion<br>Lugol-Probe (Schiller Test)<br>atypische Gefäße                                                                                                                                  |
| Verdacht auf Invasion |                       | <b>zusätzliche Befunde:</b> auf Berührung blutende Gefäße, unregelmäßige Oberfläche, exophytische Läsion, Nekrose, Ulkus, Tumor                                                                                                       |
| verschiedene Befunde  |                       | kongenitale Transformationszone (KTZ),<br>kongenitale Anomalie, Kondylome (Papillome),<br>Endometriose, Polypen (ektozervikal, endozervikal)<br>Entzündung, Stenose, postoperative Veränderung (vernarbte Portio, Scheidenblind-sack) |

3. Nomenklatur der Vulva in Zusammenarbeit mit der International Society for the Study of Vulvovaginal Diseases (ISSVD) erarbeitet. Diese wurde in einer separaten Publikation veröffentlicht.

Ziel der folgenden Erläuterungen ist es, den Bezug zwischen neuer Nomenklatur und praktischem Alltag in der kolposkopischen Untersuchung herzustellen.

Gleichzeitig möchte die Autorenschaft darauf verweisen, dass eine für den deutschsprachigen Raum gemeinsame Grundlage zur Nutzung der jetzt international gültigen kolposkopischen Nomenklatur für die Cervix uteri publiziert wurde [9]. Die Vorstände der AGK, AGCPC und AGKOL haben somit die kolposkopische Nomenklatur 2011 als die für sie gültige Nomenklatur anerkannt und ihren Mitgliedern zur Nutzung im Praxisalltag empfohlen. Wir rufen alle interessierten Kollegen auf, Kommentare und Hinweise an die Vorstände zu senden. Diese werden in die nächsten Tagungen der Nomenklaturkommission der IFCPC eingebracht.

**Tab. 2** Addendum zur kolposkopischen Nomenklatur der Cervix uteri (IFCPC 2011), nach [9].

| IFCPC 2011                           | kolposkopische Nomenklatur                                                                                                                                                                                                                            | Cervix uteri Addendum |
|--------------------------------------|-------------------------------------------------------------------------------------------------------------------------------------------------------------------------------------------------------------------------------------------------------|-----------------------|
| Exzisionstypen                       | Typ 1 – flach<br>Typ 2 – mittel<br>Typ 3 – steil                                                                                                                                                                                                      |                       |
| Dimensionen des Konisationspräparats | <b>Höhe (Länge):</b><br>Distanz zervikaler zu vaginalem Resektionsrand (s. Abb. unten)<br><b>Breite:</b><br>Distanz stromaler Resektionsrand zu epithelialer Oberfläche<br><b>Zirkumferenz (optional):</b><br>Perimeter des geöffneten Konuspräparats |                       |

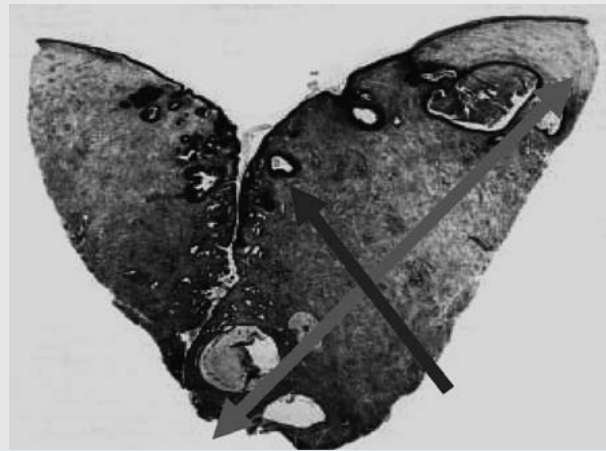

**hellgrau:** Höhe (Länge) des Konisationspräparats, **dunkelgrau:** Dicke des Konus

Hervorzuheben ist der Anspruch der Nomenklaturkommission, eine evidenzbasierte Terminologie zu entwickeln. Ebenfalls zeigt sich, dass es Anliegen der Nomenklaturkommission der IFCPC war, einen engeren Zusammenhang zum therapeutischen Vorgehen herzustellen. Beispielgebend sind die Einführung der Graduierung der Sichtbarkeit der Zylinder-Plattenepithel-Grenze oder die im Addendum erwähnten Exzisionstypen (● Tab. 2). Aus Sicht der Autoren ist dieser Schritt begrüßenswert, ergibt sich hieraus jetzt eine klarere Positionierung im Hinblick auf individuelle Therapieplanung und -durchführung. Siehe hierzu auch entsprechende deutschsprachige Grundlagenarbeiten (z. B. Kühn 2011 [7], Kühn et al. 2012 [8]). In der Gesamtsicht hebt die neue kolposkopische Nomenklatur somit die Bedeutung kolposkopischer Untersuchungen deutlicher hervor, als es bei Vorgängerversionen der Fall war.

Erfreulich ist die Tatsache, dass insbesondere 2 aktuelle Publikationen aus dem deutschsprachigen Raum (Scheungraber et al. [3, 4]) Eingang in die Novellierung der Nomenklatur gefunden haben.

Ebenso soll erwähnt werden, dass die in der Nomenklatur festgeschriebene und für die Praxis wichtige Unterscheidung der Lokalisation von Läsionen innerhalb und außerhalb der Transformationszone ebenso wie die Bedeutung der Oberflächenausdehnung einer Dysplasie an der Cervix uteri durch Arbeiten aus dem deutschsprachigen Raum grundlegend wissenschaftlich begründet sind [10, 11].

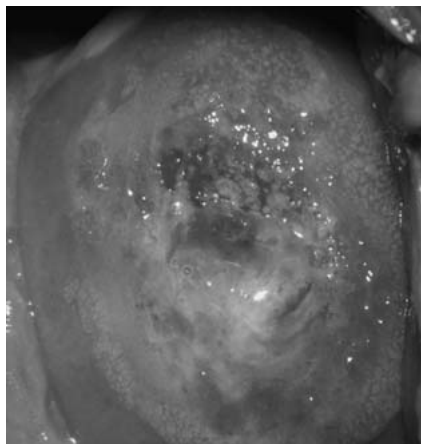

**Abb. 1** Regulär essigweißes Mosaik bei zytologisch PAP II, histologisch Zeichen der Zervizitis.

Im Folgenden wird auf die Aspekte eingegangen, die sich im Vergleich zur bisher gültigen Terminologie (Barcelona 2002 [6]) verändert haben bzw. eine Neuaufnahme erfahren haben.

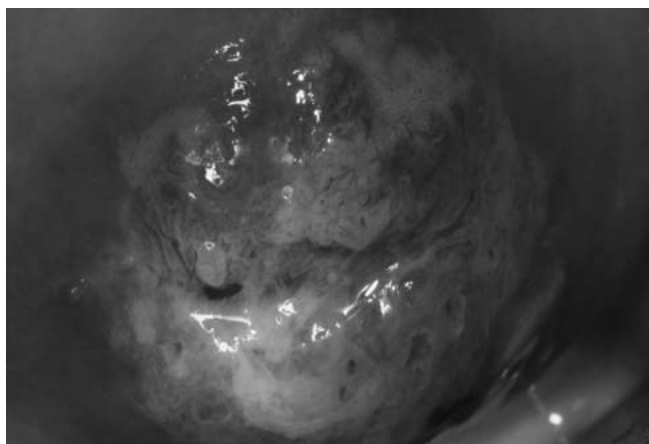

**Abb. 2** Opakes essigweißes Epithel der vorderen Muttermundslippe bei 12 Uhr mit grobem Mosaik (major change), Transformationszone 1, histologisch CIN 3.

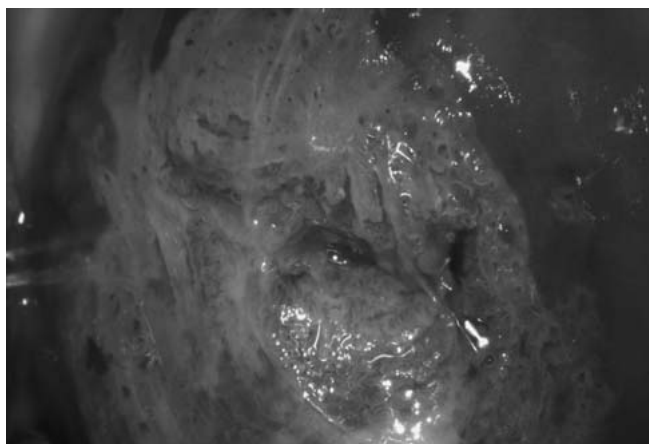

**Abb. 4** Deutlich essigweißes Epithel der vorderen Muttermundslippe mit typischem „ridge sign“ (major change) bei histologisch gesicherter CIN 3, Transformationszone 1.

## Nomenklatur der Cervix uteri

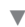

Für die kolposkopische Nomenklatur der Cervix uteri und der Vagina sind grundsätzliche Vorbemerkungen erstellt worden, die von fundamentaler Bedeutung sind: Ist die kolposkopische Untersuchung „adäquat“ oder „inadäquat“ mit Begründung. Damit wurden die Begriffe „satisfactory/unsatisfactory colposcopy“ ersetzt. Diese Änderung soll hervorheben, dass bei inadäquater Kolposkopie wegen z. B. Entzündung eine Kontrolluntersuchung nach Therapie durchzuführen ist. Die Verschiebung der Beurteilbarkeit und der generellen Aussagekraft einer kolposkopischen Untersuchung an den Nomenklaturanfang unterstreicht deren Wertigkeit.

Das gilt vor allem für die Einsehbarkeit der Zylinder-Plattenepithel-Grenze und damit die Klassifikation der Transformationszone nach den Typen 1–3. Beide Einteilungen überschneiden sich durchaus, sind aber 2 verschiedene Aspekte. Die Zylinder-Plattenepithel-Grenze ist der „innere“ Rand der Transformationszone (adulte Zylinderepithelgrenze) und kann entsprechend „komplett“, „teilweise“ oder „nicht sichtbar“ sein. Bei der Transformationszone 1 und 2 ist die Zylinder-Plattenepithel-Grenze komplett einsehbar. Wie oben erwähnt ist es Anliegen der Nomenklaturkommission der IFCPC, ggf. notwendige Therapie-

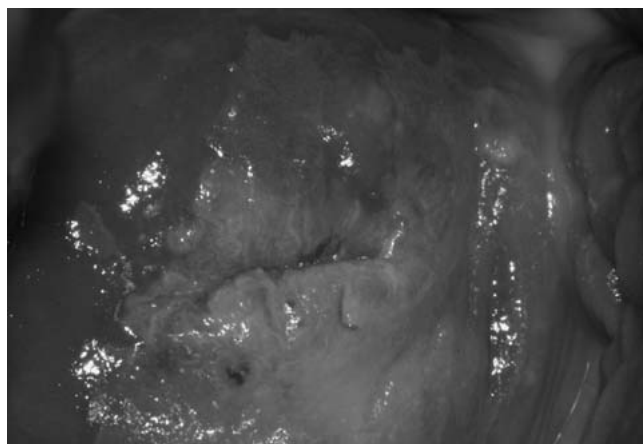

**Abb. 3** Deutlich essigweißes Epithel mit „inner border“ bei 1 Uhr ektozervikal bei histologisch gesicherter CIN 2 (major change).

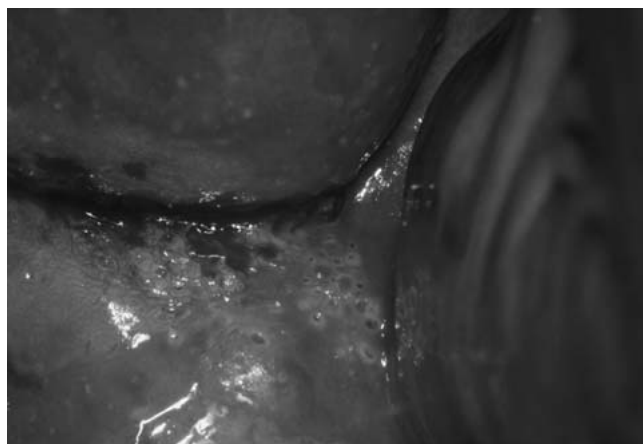

**Abb. 5** Essigweißer erhabener Randwall von Zervixdrüsenausführungsgängen an der hinteren Muttermundslippe (major change) bei histologisch gesicherter CIN 3.

optionen besser planen zu können. Die Beurteilung beider Aspekte erlaubt dieses besser, z.B. für eine gezielte Exzision des abnormen Areals (Exzisionstyp).

Bei den normalen Befunden wurde eine Erweiterung vorgenommen: atrophes Plattenepithel, Veränderungen in der Schwangerschaft (Deziduose) und Metaplasie. Kritisch anzumerken ist, dass die Diagnosestellung einer Metaplasie eigentlich eine vorherige histologische Abklärung erforderlich macht, um beweisend von einer Metaplasie zu sprechen, und dass andere funktionelle Befunde fehlen: z.B. hyperplastische oder polypöse Ektopie.

Bei den abnormen kolposkopischen Befunden wurde die Lokalisation der Läsion – innerhalb oder außerhalb der Transformationszone – wieder in die Nomenklatur aufgenommen und um die Begriffe „inner border“ (Grenzen innerhalb des essigweißen Epithels) und „ridge sign“ (Bergrückenphänomen) ergänzt [3, 4]. Die Größe der Läsion ist in die Nomenklatur eingegangen, wobei die Dimension der Läsion als Anzahl der betroffenen Quadranten bzw. als Prozent der Zervix angegeben werden soll.

Das bereits in der Nomenklatur Rom 1991 [5] festgelegte Grading in „minor“ und „major changes“ wurde beibehalten. „Minor changes“ können auch als Grad-1-Veränderungen (☉ **Abb. 1**) und „major changes“ als Grad-2-Veränderungen (☉ **Abb. 2** bis 5) beschrieben werden.

Neu berücksichtigt wurde die Interpretation der Dynamik der Essigsäurereaktion an der Cervix uteri. Es wird darauf hingewiesen, dass eine schnelle und intensiv positive Essigsäurereaktion den „major changes“ zugeordnet werden muss. Es sei darauf hingewiesen, dass aber auch eine langsame Entwicklung einer positiven Essigsäurereaktion, die in Einzelfällen bis zu 3 Minuten Reaktionszeit benötigt, den „major changes“ zugehörig ist, wenn die anderen in der Tabelle aufgeführten „Major change“-Kriterien zutreffen.

Wie bereits einleitend erwähnt, konnte sich das Komitee nicht dazu entschließen, die Begriffe der Leukoplakie in die geringgradigen bzw. hochgradigen Veränderungen einzuordnen. Leukoplakie, Erosion und die Lugol-Probe (Schiller-Test) wurden als „non specific“ = „nicht spezifisch“ klassifiziert. Insbesondere die Einordnung der Lugol-Probe als unspezifische Untersuchungsmethode unterstreicht die Notwendigkeit einer präoperativen Essigsäureanwendung. Die Lugol-Probe alleine ist keine geeignete Maßnahme, präoperativ die Exzisionsfigur festzulegen.

Eine Erweiterung findet sich bei Verdacht auf Invasion dahingehend, dass atypische Gefäße jetzt nur noch als Invasionsmerkmal definiert werden; anders als bei den vorherigen Nomenklaturvorschlägen. Bislang wurden atypische Gefäße auch zu den „Major change“-Läsionen gezählt. Zusätzlich haben weitere klinische Aspekte Eingang gefunden, wie etwa die auf Berührung blutenden Gefäße.

Unter den sogenannten verschiedenen Befunden finden sich die „kongenitale Transformationszone, CTZ“ und postoperative Veränderungen wie etwa die „vernarbte Portio“ (nach Konisation) oder der „Scheidenblindsack“. Eine exakte Beschreibung zum Begriff der CTZ steht aus und wird in die Diskussionen der IFCCP-Nomenklaturkommission eingebracht.

## Addendum: Exzisionstypen und Konisationspräparat

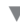

Als „Addendum“ (☉ **Tab. 2**) werden 3 verschiedene Exzisionstypen und auch die Dimensionen des Konisationspräparats eingeführt. Die Exzisionstypen stellen den praktischen Bezug zu den Typen der Transformationszone dar und sollen die weitere Nutzung der verschiedensten Exzisionstermini durch die Beschreibung der durchgeführten Exzision und nicht die der Methode ersetzen.

## Interessenkonflikt



Nein.

## Literatur

- 1 Bornstein J, Bentley J, Böse P et al. 2011 colposcopic terminology of the International Federation for Cervical Pathology and Colposcopy. *Obstet Gynecol* 2012; 120: 166–172
- 2 Bornstein J, Sideri M, Tatti S et al. 2011 terminology of the vulva of the International Federation for Cervical Pathology and Colposcopy. *J Low Genit Tract Dis* 2012; 16: 290–295
- 3 Scheungraber C, Glutig K, Fechtel B et al. Inner border—a specific and significant colposcopic sign for moderate or severe dysplasia (cervical intraepithelial neoplasia 2 or 3). *J Low Genit Tract Dis* 2009; 13: 1–4
- 4 Scheungraber C, Koenig U, Fechtel B et al. The colposcopic feature ridge sign is associated with the presence of cervical intraepithelial neoplasia 2/3 and human papillomavirus 16 in young women. *J Low Genit Tract Dis* 2009; 13: 13–16
- 5 Staffl A, Wilbanks GD. An international terminology of colposcopy: report of the nomenclature committee of the International Federation of Cervical Pathology and Colposcopy. *Obstet Gynecol* 1991; 77: 313–314
- 6 Quaas J, Petry K-U, Heinrich J. Darstellung und Erläuterungen zur aktuellen kolposkopischen Nomenklatur Barcelona 2002. *Geburtsh Frauenheilk* 2007; 67: 1324–1327
- 7 Kühn W. Kolposkopie zur Früherkennung des Zervixkarzinoms. *Pathologie* 2011; 32: 497–495
- 8 Kühn W, Cichon G, Schneider A. Morphologische Aspekte zu frühgeburtsvermeidenden Konisationstechniken. *gyn* 2012; 17: 262–268
- 9 Girardi F, Frey Tirri B, Küppers V et al. Neue kolposkopische IFCCP-Nomenklatur der Cervix uteri (Rio de Janeiro 2011). *Frauenarzt* 2012; 53: 1064–1065
- 10 Burghardt E, Pickel H, Girardi F. *Colposcopy-cervical Pathology*. 3rd ed. Stuttgart: Thieme; 1998
- 11 Fritsch H, Hoermann R, Bitsche M et al. Development of epithelial and mesenchymal regionalization of the human fetal utero-vaginal anlagen. *J Anat* 2013; 222: 462–472
